# Supplementary material for: Copper catalyzed atom transfer radical cascade reactions in the presence of free-radical diazo initiators as reducing agents
Source: Royal Society of Chemistry journal article supplement (doi:10.1039/b905839g), 2009-01-01
Supplement: b905839g.pdf [file b905839g.pdf]

## SUPPORTING INFORMATION

### **Copper Catalyzed Atom Transfer Radical Cascade Reactions in the Presence of Free-Radical Initiators as Reducing Agents**

Carolynne Ricardo and Tomislav Pintauer\*

*Department of Chemistry and Biochemistry, Duquesne University, 600 Forbes Avenue, 308 Mellon Hall, Pittsburgh, PA 15282, Tel: 412-396-1626, Fax: 412-396-5683, Email: [pintauert@duq.edu](mailto:pintauert@duq.edu)*

#### **Experimental Section**

**General Procedures.** 2,2'-Azobis(2-methylpropionitrile) (AIBN) was recrystallized from cold methanol and dried at room temperature under vacuum prior to use. Tris(2-pyridylmethyl)amine (TPMA)<sup>1</sup> and [Cu<sup>II</sup>(TPMA)Cl][Cl]<sup>2</sup> were synthesized according to literature procedures. All other chemicals were purchased from commercial sources and used as received. <sup>1</sup>H NMR and <sup>13</sup>C NMR spectra were recorded at room temperature on the Bruker Avance Spectrometer operating at 400 MHz and 100 MHz, respectively. Chemical shifts are given in ppm relative to residual CDCl<sub>3</sub> peak (δ7.26 ppm for <sup>1</sup>H and δ77 ppm for <sup>13</sup>C). IR spectra were recorded in the solid state or solution using Nicolet Smart Orbit 380 FT-IR spectrometer (Thermo Electron Corporation).

**Catalyst Solutions.** 0.01M and 0.005M solutions of [Cu<sup>II</sup>(TPMA)Cl][Cl] were prepared by dissolving the copper(II) complex in MeOH using volumetric flasks to accommodate various catalyst loadings.

**General Procedure for Addition of Carbon Tetrachloride to 1,6-Heptadiene Catalyzed by [Cu<sup>II</sup>(TPMA)Cl][Cl] in the Presence of AIBN.** All reactions were performed in disposable 5.0mm NMR tubes equipped with a plastic cap. In a typical experiment, 1,6-heptadiene (2.0 mmol, 269 μL), CCl<sub>4</sub> (2.5 mmol, 241μL), AIBN (0.1 mmol, 0.0164 g) and internal standard (1,4-dimethoxybenzene or toluene, 10 mol% relative to 1,6-diene) were dissolved in 510 μL of methanol in order to make the final solution 2.0M in 1,6-heptadiene. 200 μL of the stock solution (0.4 mmol 1,6-heptadiene, 0.5 mmol CCl<sub>4</sub> and 0.02 mmol AIBN) were then added to the NMR tube, followed by the desired amount of the copper(II) complex (from 0.01M [Cu<sup>II</sup>(TPMA)Cl][Cl] and for [1,6-heptadiene]<sub>0</sub>: [Cu<sup>II</sup>]<sub>0</sub> ratios of 1000:1 (V= 40μL) and 2000:1 (V= 20μL), from 0.05M

[Cu<sup>II</sup>(TPMA)Cl][Cl] and for [1,6-heptadiene]<sub>0</sub>: [Cu<sup>II</sup>]<sub>0</sub> ratio of 5000:1 (V= 16μL) and 10000:1 (V= 8μL)) and the total volume adjusted by adding methanol in order to maintain the concentration of 1,6-heptadiene at 1.0M. The NMR tube was then flushed with argon for 30 seconds, sealed with a plastic cap and teflon tape, followed by electrical tape and heated in an oil bath thermostated at 60 °C for 24h. The conversion of 1,6-heptadiene and the percent yield of the products were obtained using <sup>1</sup>H NMR spectroscopy. The *trans*- and *cis*- ratios were determined by <sup>1</sup>H NMR after solvent evaporation.

**General Procedure for Addition of Carbon Tetrachloride to 1,6-Heptadiene Catalyzed by [Cu<sup>II</sup>(TPMA)Cl][Cl] and V-70.** Similar procedure to the one above was followed but using V-70 as the radical initiator (0.0308g, 0.1 mmol). 150 μL of the stock solution (0.3 mmol diene, 0.375 mmol CCl<sub>4</sub> and 0.015 mmol V-70) was then added to the NMR tube, followed by the desired amount of the copper(II) complex (from 0.01M [Cu<sup>II</sup>(TPMA)Cl][Cl] and for [1,6-heptadiene]<sub>0</sub>: [Cu<sup>II</sup>]<sub>0</sub> ratio of 1000:1 (V= 30μL), from 0.05M [Cu<sup>II</sup>(TPMA)Cl][Cl] and for [1,6-heptadiene]<sub>0</sub>: [Cu<sup>II</sup>]<sub>0</sub> ratio of 5000:1 (V= 12μL) and 10000:1 (V= 6μL)). The total volume was then adjusted by adding methanol maintaining the concentration of 1,6-heptadiene at 1.0M. The reaction mixture was left at room temperature (22±2 °C) or immersed in an oil bath thermostated at 30°C for a period of 24 h. The conversion of 1,6-heptadiene and the percent yield of the products were obtained using <sup>1</sup>H NMR spectroscopy. The *trans*- and *cis*- ratios were determined by <sup>1</sup>H NMR after solvent evaporation.

**General Procedure for Addition of Carbon Tetrachloride to 1,6-Dienes Catalyzed by [Cu<sup>II</sup>(TPMA)Cl][Cl] and AIBN/V-70.** Same procedures described above were followed except that the following volumes of 1,6-diene in the stock solution were used: V(diallyl ether)=244μL, V(diethyldiallylmalonate)= 484μL, V(*tert*-butyl-*N,N*-diallylcarbamate)= 216μL) and V(*N,N*-diallyl-2,2,2-trifluoroacetamide)= 342μL). After adding CCl<sub>4</sub> (2.5 mmol, 241μL), reducing agent (0.1 mmol, AIBN = 0.0164 g or V-70= 0.0308 g) and internal standard (1,4-dimethoxybenzene or toluene, 10 mol% relative to 1,6-diene), methanol was added to maintain the concentration of 1,6-diene at 2.0 M (for diallyl ether = 515μL, diethyldiallylmalonate=275 μL, *tert*-butyl-*N,N*-diallylcarbamate=543μL) and *N,N*-diallyl-2,2,2-trifluoroacetamide= 417μL).

**Product Characterization.**  $^1\text{H}$  and  $^{13}\text{C}$  NMR spectra for all 5-*exo-trig* cyclic products have been reported elsewhere,<sup>3</sup> except for 1-(3-(chloromethyl)-4-(2,2,2-trichloroethyl)pyrrolidin-1-yl)-2,2,2-trifluoroethanone.

**1-(3-(Chloromethyl)-4-(2,2,2-trichloroethyl)pyrrolidin-1-yl)-2,2,2-trifluoroethanone.**

$^1\text{H}$  ( $\text{CDCl}_3$ , 400 MHz, RT): mixture of *cis* and *trans*,  $\delta$ 3.95-4.10 (m, 1H),  $\delta$ 3.65-3.90 (m, 3H),  $\delta$ 3.40-3.55 (m, 2H),  $\delta$ 3.00-3.10 (m, 2H),  $\delta$ 2.80-2.85 (m, 2H).

$^{13}\text{C}$  ( $\text{CDCl}_3$ , 100 MHz, RT): mixture of *cis* and *trans*,  $\delta$ 156.0, 155.5, 117.6, 114.7, 97.9, 53.2, 52.8, 51.1, 50.3, 49.3, 42.7, 42.0, 41.2, 39.0, 37.2.

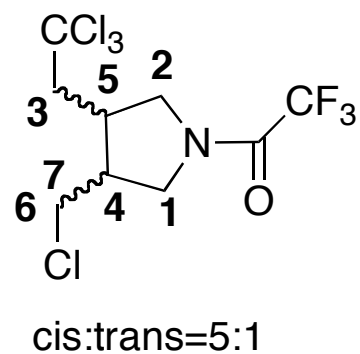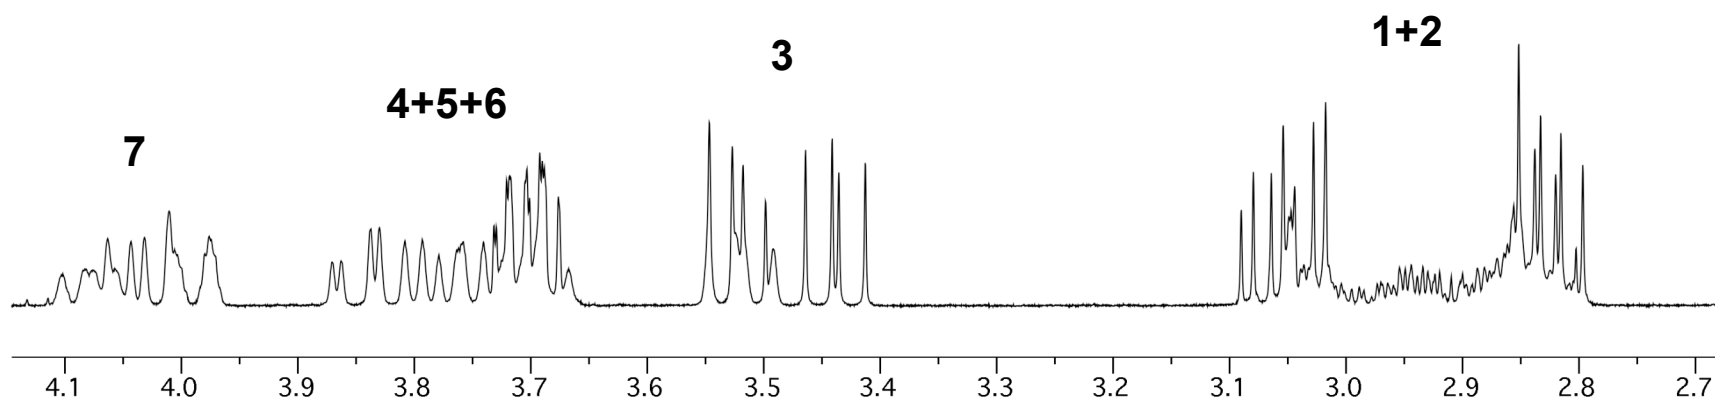

**Figure 1S.**  $^1\text{H}$  NMR ( $\text{CD}_3\text{Cl}$ , RT, 400 MHz) spectrum of a mixture of *cis* and *trans* 1-(3-(Chloromethyl)-4-(2,2,2-trichloroethyl)pyrrolidin-1-yl)-2,2,2-trifluoroethanone.

## References

- (1) Tyeklar, Z.; Jacobson, R. R.; Wei, N.; Murthy, N. N.; Zubieta, J.; Karlin, K. D. *J. Am. Chem. Soc.* **1993**, *115*, 2677-2689.
- (2) Eckenhoff, W. T.; Pintauer, T. *Inorg. Chem.* **2007**, *46*, 5844-5846.
- (3) Munoz-Molina, J. M.; Belderrain, T. R.; Perez, P. J. *Adv. Synth. Catal.* **2008**, *350*, 2365-2372.
